# Supplementary material for: Promoting Health via mHealth Applications Using a French Version of the Mobile App Rating Scale: Adaptation and Validation Study
Source: PubMed Central journal article supplement (PMC8441605; doi:10.2196/30480), 2021-08-31
Supplement: mhealth_v9i8e30480_app3.pdf [file mhealth_v9i8e30480_app3.pdf]

**Multimedia Appendix 3.** Comparison of internal consistencies and the Mokken Scale Analysis between Mobile App Rating Scale in English and other available translations of the scale.

|                      |                                |                           | MARS English     | MARS German      | MARS Italian                                       | MARS Spanish               | MARS Arabic      | MARS French      |         |
|----------------------|--------------------------------|---------------------------|------------------|------------------|----------------------------------------------------|----------------------------|------------------|------------------|---------|
|                      | Intraclass Correlation (95%CI) |                           | 0.79 (0.75-0.83) | 0.83 (0.82-0.85) | 0.96 (0.93-0.98)                                   | 0.96 (0.92-0.98)           | 0.84 (0.82-0.85) | 0.89 (0.80-0.93) |         |
| Internal consistency | Engagement                     | Cronbach's alpha (95%CI)  | 0.89             |                  | Rater1=0.85 (0.76-0.91)<br>Rater2=0.84 (0.75-0.90) | Rater1=0.88<br>Rater2=0.87 | 0.96             |                  |         |
|                      |                                | Omega coefficient (95%CI) |                  | 0.84 (0.77-0.88) |                                                    |                            |                  | 0.79 (0.72-0.83) |         |
|                      | Functionality                  | Cronbach's alpha (95%CI)  | 0.80             |                  | Rater1=0.77 (0.63-0.87)<br>Rater2=0.87 (0.79-0.92) | Rater1=0.87<br>Rater2=0.86 | 0.71             |                  |         |
|                      |                                | Omega coefficient (95%CI) |                  | 0.90 (0.85-0.94) |                                                    |                            |                  | 0.79 (0.73-0.85) |         |
|                      | Esthetics                      | Cronbach's alpha (95%CI)  | 0.86             |                  | Rater1=0.92 (0.86-0.95)<br>Rater2=0.88 (0.81-0.93) | Rater1=0.86<br>Rater2=0.77 | 0.94             |                  |         |
|                      |                                | Omega coefficient (95%CI) |                  | 0.91 (0.92-0.96) |                                                    |                            |                  | 0.78 (0.71-0.82) |         |
|                      | Information quality            | Cronbach's alpha (95%CI)  | 0.81             |                  | Rater1=0.73 (0.57-0.84)<br>Rater2=0.71 (0.54-0.83) | Rater1=0.84<br>Rater2=0.78 | 0.81             |                  |         |
|                      |                                | Omega coefficient (95%CI) |                  | 0.74 (0.14-0.99) |                                                    |                            |                  | 0.61 (0.53-0.65) |         |
|                      | Total score                    | Cronbach's alpha (95%CI)  | 0.85 (0.80-0.89) |                  | Rater1=0.90 (0.85-0.94)<br>Rater2=0.91 (0.87-0.94) | Rater1=0.94<br>Rater2=0.94 |                  |                  |         |
|                      |                                | Omega coefficient (95%CI) |                  | 0.81 (0.74-0.86) |                                                    |                            |                  | 0.86 (0.85-0.90) |         |
|                      | Subjective quality             | Cronbach's alpha (95%CI)  | 0.93             |                  | Rater1=0.95 (0.92-0.97)<br>Rater2=0.93 (0.89-0.96) | Rater1=0.86<br>Rater2=0.88 | 0.97             |                  |         |
|                      | Mokken Scale Analysis          |                           |                  |                  | H=0.48                                             |                            |                  |                  | H=0.35; |
|                      |                                |                           |                  |                  | SE 0.06                                            |                            |                  |                  | SE 0.03 |
|                      |                                |                           |                  |                  | MS=0.74                                            |                            |                  |                  | MS=0.88 |
|                      |                                |                           |                  | lambda 2=0.72    |                                                    |                            |                  | lambda 2=0.89    |         |
|                      |                                |                           |                  | LCRC=0.74        |                                                    |                            |                  | LCRC=0.90        |         |
